# Supplementary material for: Label as you fold: methyltransferase-assisted functionalization of DNA nanostructures
Source: Royal Society of Chemistry journal article supplement (doi:10.1039/d0nr03694c), 2020-01-01
Supplement: d0nr03694c2.xlsx [file d0nr03694c2.xlsx]

## Sheet: Tabelle1
	name	sequence
	t8s27g	TCGCGAACTTTAAAACAGAGGTGAGGCTTTTAGAAGTATTT
	t8s7g	TAGCCATTTTTAAACGTCACCAATGAATTCACCAGAACCAT
	t9s10h	TTATCTTACCGAAGCCCTTAAACGCAATAATAACGTTAAAATCACCAGT
	t9s16e	TACTAAAGTACGGTGTCTTGAATATAAT
	t9s18g	TTGCTGTAGTTATCCCCCTCAAATGCTTTGCGAGAGGCTTTTGCAT
	t9s20h	TAAAGAAGTTTTGCCAGTTCATAAATATTCATTGATTCTCAACATGTTT
	t9s26e	TACCACCAGCAGAAGATTTGATAGCCCT
	t9s28g	TTAAAACATTTTAGAAGAACTCAAACTTTTTTTATAATCAGTGAGT
	t9s30h	TGCCACCGAGTAAAAGATTACATCACTTGCCTGAGTTCGCCATTAAAAT
	t9s6e	TCCATTAGCAAGGCCGGTTGGGAATTAT
	t9s8g	TGAGCCAGCTTGAATACCCAAAAGAACTTATGAAATAGCAATAGCT
	t-10s17h	TACCAACCTAAATTAAATCAACGTAACAAATTTAAATTGGGCTTGAGAT
	t-10s27h	TAACTCACATTATTTTGAGTGTTGTTCCAGTTAAACCGTCTATCAGGGT
	t-10s7h	TACGACAATAAATTTCCCGACTTGCGGGAGTTATCCTGAATCTTACCAT
	t-12s19h	TCCTGACGAGAAACACCAGAACGAGTAGTTGCTGCTCATTCAGTGAT
	t-12s29h	TACGTGGACTCCAACGTCAAAGGGCGAATTTTTGGAACAAGAGTCCT
	t-12s9h	TTGCTATTTTGCACCCAGCTACAATTTTTTGTTTTGAAGCCTTAAAT
	t-1s10e	TAGAGAATAACATAAAAACAGGGAAGCGCATTAT
	t-1s12i	TAGGGATAGTTCTCAGAGCCACCACCCCATGTCAAT
	t-1s14e	TATTTTCTGTTTCAGCGGAGTGAGAATTTACCGATATT
	t-1s14i	TCAACAGTTTTTATGGGATTTTGCTAATCAAAAGGT
	t-1s16e	TATTCGGTCTTTGCGGGATCGTCACCCTTGAAATCCGT
	t-1s16i	TGCCGCTTTTTGCTGAGGCTTGCAGGGGAAAAGGTT
	t-1s18g	TCGACCTGCTTGGTCAATCATAAGGGATTACGGAACAACATTATTT
	t-1s18i	TGCGCAGACTTTCCATGTTACTTAGCCCGTTTTAAT
	t-1s20e	TACAGGTAGAAAGATTCATCAGTTGAGATTTAGT
	t-1s22i	TCGCGTCTGTTATAGGAACGCCATCAACTTTTACAT
	t-1s24e	TCAGTTTGATTCGCACTCCAGCCAGCTTTAAACGACGT
	t-1s24i	TAGGAAGATTTGGGGACGACGACAGTAATCATATTT
	t-1s26e	TGCCAGTGCTTGATCCCCGGGTACCGATTGTTTTTCTT
	t-1s26i	TCTCTAGAGTTCAAGCTTGCATGCCTGGTCAGTTGT
	t-1s28g	TTTTCACCATTGCCTGGCCCTGAGAGATTAAGCCGGCGAACGTGGT
	t-1s28i	TCCTTCACCTTGTGAGACGGGCAACAGCAGTCACAT
	t-1s2i	TCCTTTTTTTTCATTTAACAATTTCATAGGATTAGT
	t-1s30e	TCGAGAAAGGAAGGGAATGCGTACTATGGTTGCTT
	t-1s4e	TTTATCAAATTCCGGCTTAGGTTGGGTTTAAGCCTGTT
	t-1s4i	TTTTAACCTTTATCATAGGTCTGAGAGTTCCAGTAT
	t-1s6e	TTTAGTATCTTGCCAACGCTCAACAGTTTCGGCTGTCT
	t-1s6i	TAGTATAAATTATATGCGTTATACAAAGCCATCTTT
	t-1s8g	TTTTCCTTATTGCACTCATCGAGAACATTATAGCAGCCTTTACAGT
	t-1s8i	TCAAGTACCTTTCATTCCAAGAACGGGAAATTCATT
	t-2s11g	TCCTCAGAACCGCCACCTTCAAGCCCAATAGGAACTTGTAAATGAT
	t-2s13g	TAGACGTTATTCCATGTACCGTAACACTTCCCTCAGAACCGCCACT
	t-2s15f	TCACGCATATTAGAAAGGAACAACTAATTGTCTTTCCT
	t-2s17f	TATTGTGTCTTTCAGCAGCGAAAGACATTCCATCGCCT
	t-2s1g	TAAAACAAAATTAATTATTAATGGAAACAGTACATTTTAGTGAATT
	t-2s21g	TGCTCATTTTTTAACCATTGCCTTCCTGTAGCCAGTTGCATCTGCT
	t-2s23g	TGTAACCGTTTCTTTCATCAACATTAATTAATTTTTGTTAAATCAT
	t-2s25f	TACGTTGTATTTTCCGGCACCGCTTCTTTGGCGCATCT
	t-2s27f	TCCAGGGTGTTGCTCGAATTCGTAATCTTCAGTCACGT
	t-2s3g	TAGAGTCAATTAAATCAATATATGTGATTTGAAACAAACATCAAGT
	t-2s5f	TACTAGAAATTTATATAACTATATGTATTCGCTGAGAT
	t-2s7f	TTCAATAATTTAGGGCTTAATTGAGAATTTCATAATTT
	t-3s10g	TAACGTCAAAAATGAAATTAGCAAGCCGTTTTTATTTGAAACCAAT
	t-3s14e	TGTTTTGTCTTAGGAATTGCGAATAATTTCCGACAATT
	t-3s16e	TGACAACAATTGCATCGGAACGAGGGTTTGAGATTTGT
	t-3s18g	TTATCATCGTTTTGAAAGAGGACAGATTTGGAAGAAAAATCTACGT
	t-3s20g	TTTAATAAAACGAACTATTACCGAACTGACCAACTTTCCTGATAAT
	t-3s24e	TTGTAGATGTTGGTGCCGGAAACCAGGTTAACGCCAGT
	t-3s26e	TGGTTTTCCTTATGGTCATAGCTGTTTTTGAGAGGCGT
	t-3s28g	TGTTTGCGTTTCACGCTGGTTTGCCCCTTAAGGGAGCCCCCGATTT
	t-3s30g	TTAGAGCTTGACGGGGATTGTTGCAGCAAGCGGTCTTATTGGGCGT
	t-3s4e	TGATTAAGATTAATGCTGATGCAAATCTTAGAATAAAT
	t-3s6e	TCACCGGAATTTCGCCATATTTAACAATTAATTTACGT
	t-3s8g	TAGCATGTATTTTTCATCGTAGGAATCTTAAACGATTTTTTGTTTT
	t-4s11g	TAGGTTTAGTACCGCCATTTGAGTTTCGTCACCAGTTGATCTAAAT
	t-4s13g	TAGCGTAACTTTACAAACTACAACGCCTTTATCACCGTACTCAGGT
	t-4s15f	TTAGTTGCGTTAATTTTTTCACGTTGATTTCATAGTTT
	t-4s17f	TGTACAACGTTAGCAACGGCTACAGAGTTGATACCGAT
	t-4s1g	TGAGCAAAAGAAGATGATTGTGAATAACCTTGCTTTTATAGCTTAT
	t-4s21g	TGTTAAAATTCGCATTATTATGTGAGCGAGTAACATTCACGTTGGT
	t-4s23g	TGGATAGGTTTACCCGTCGGATTCTCCTTTAAACGTTAATATTTTT
	t-4s25f	TAGTTGGGTTTCAAAGCGCCATTCGCCTTCCGTAATGT
	t-4s27f	TCGCGCGGGTTCCTGTGTGAAATTGTTTTGGCGATTAT
	t-4s3g	TACATAGCGTTCTGTAAATCGTCGCTATTTTCATTTCAATTACCTT
	t-4s5f	TGTTAAATATTCAATCGCAAGACAAAGTTCCTTGAAAT
	t-4s7f	TCCCATCCTTTCGCCAACATGTAATTTTTAATAAGGCT
	t-5s10g	TTCCCAATCCAAATAAGTTATTACCGCGCCCAATATTAATAATATT
	t-5s16e	TAACAGCTTTTGCTTTGAGGACTAAAGTTCGATTATAT
	t-5s18g	TCCAAGCGCTTAGGCGCATAGGCTGGCTTAGAACTGGCTCATTATT
	t-5s20g	TACCAGTCAGGACGTTGTTGAACGGTGTACAGACCTTGAAACAAAT
	t-5s26e	TTGCTGCAATTATCCGCTCACAATTCCTTCAGCTGCAT
	t-5s28g	TTTAATGAATTGTTTGATGGTGGTTCCTTGAGGTGCCGTAAAGCAT
	t-5s30g	TCTAAATCGGAACCCTATTAGCAGGCGAAAATCCTTTTCGGCCAAT
	t-5s6e	TGTGTGATATTAGGCAGAGGCATTTTCTTAGTCCTGAT
	t-5s8g	TACAAGAAATTGCAAGCAAATCAGATATTACAGCCATATTATTTAT
	t-6s13f	TACAGACAGCCCTTAAATCTCCAAAAAAAATTATTTCTTAT
	t-6s15c	TCGAGGTGATTGGCTCCAAAAGGAGCCT
	t-6s17f	TACCCCCAGTTACTTTTTCATGAGGAATTCTTGCTTTT
	t-6s23f	TCGGCGGATTGATTATTCAGGCTGCGCAACTTGGGGGATGT
	t-6s25c	TTGGCGAAATTTGTTGGGAAGGGCGATT
	t-6s27f	TTGTCGTGCTTACACAACATACGAGCCTTACGCCAGCT
	t-6s3f	TTCCCTTAGAATTTAACGCGAGAAAACTTTTTTACCGACCT
	t-6s5c	TGTTTGAAATTTTCAAATATATTTTAGT
	t-6s7f	TAATAGATATTGAGCCAGTAATAAGAGTTATTTAATGT
	t-7s10g	TGCCAGTTACAAAATAATTTAGAAGGCTTATCCGGTTTTATCAACT
	t-7s18g	TAAAACACTTTTAATCTTGACAAGAACTTTTAATCATTGTGAATTT
	t-7s20g	TACCTTATGCGATTTTATTTGACCTTCATCAAGAGTTCATCTTTGT
	t-7s28g	TTTCCAGTCTTCTTATAAATCAAAAGATTGAACCATCACCCAAATT
	t-7s30g	TCAAGTTTTTTGGGGTCTTGAAATCGGCAAAATCCTTGGGAAACCT
	t-7s8g	TGCGCCTGTTTTATTCTAAGAACGCGATTTTCCAGAGCCTAATTTT
	t-8s15f	TCGGTTTATCAGTTGTTTCCATTAAACGGGTTAATACACTT
	t-8s17c	TGGCAAAAGTTTAAAATACGTAATGCCT
	t-8s25f	TTCTTCGCTATTTTGGAAGCATAAAGTGTATTTGCCCGCTT
	t-8s27c	TGCGCTCACTTAAGCCTGGGGTGCCTAT
	t-8s5f	TTTCTGACCTAATTAATATAAAGTACCGACTTTGCAGAACT
	t-8s7c	TTCAGCTAATTAAAAGGTAAAGTAATTT
	t-9s10g	TACGCTAACGAGCGTCTTTGGCGTTTTAGCGAACCTTCAACATGTT
	t-9s20g	TTGGTTTAATTTCAACTTTCGGATATTCATTACCCTTACGAAAGAT
	t-9s30g	TCGATGGCCCACTACGTTTATAGCCCGAGATAGGGTTATTGCGTTT
	ts-rem	GCGCTTAATGCGCCGCTACAGGGCT
	t-5s2e-t6s23c-3T	TTTAATTAATTTTTTACCATATCAAAT
	t-7s4e-t8s25c-2T	TTTAATTTCATCTTAGACTTTACAAT
	t-9s6e-t10s27c-1T	TCTGTCCAGACGTTATACCGAACGAT
	t-11s8e-t12s29c-0T	TTCAAGATTAGTTTGTAGCAATACTT
	t-5s12e-t6s3c-3T	TTGTAGCATTCCTTTTATAAACAGTTT
	t-7s14e-t8s5c-2T	TTTTAATTGTATTTCCACCAGAGCCT
	t-9s16e-t10s7c-1T	TACTACGAAGGCTTTAGCACCATTAT
	t-11s18e-t12s9c-0T	TATAAGGCTTGCTTAACAAAGTTACT
	t-5s22e-t6s13c-3T	TGTGGGAACAAATTTCTATTTTTGAGT
	t-7s24e-t8s15c-2T	TCGGTGCGGGCCTTCCAAAAACATTT
	t-9s26e-t10s17c-1T	TATGAGTGAGCTTTTTAAATATGCAT
	t-11s28e-t12s19c-0T	TACTATTAAAGATTGGATAGCGTCCT
	t11s18h	TAATACTGCGGAATCGTTTAGGGGGTAATAGTAAAATGTTTAGACTT
	t11s28h	TTCTTTGATTAGTAATATTGTCTGTCCATCACGCAAATTAACCGTTT
	t11s8h	TCAGAAGGAAACCGAGGTTTTTTTAAGAAAAGTAAGCAGATAGCCGT
	t1s10g	TGACGGGAGAATTAACTTTCGGAATAAGTTTATTTTTCCAGCGCCT
	t1s12i	TTCATATGTTTGTAATCGTAAAACTAGTCATTTTCT
	t1s14i	TGTGAGAAATTATGTGTAGGTAAAGATACAACTTTT
	t1s16i	TGGCATCAATTATTTGGGGCGCGAGCTAGTTAAAGT
	t1s18i	TTTCGAGCTTTAAGACTTCAAATATCGGGAACGAGT
	t1s20g	TGAATACCACATTCAACTTTTAAGAGGAAGCCCGATTTCAAAGCGT
	t1s22i	TTCGGGAGATTTATACAGTAACAGTACAAATAATTT
	t1s24i	TCCTGATTATTAAGGAGCGGAATTATCTCGGCCTCT
	t1s26i	TGCAAATCATTCCTCAATCAATATCTGCAGGTCGAT
	t1s28i	TCGACCAGTTTACATTGGCAGATTCACCTGATTGCT
	t1s2i	TCGGGGTTTTTCCTCAAGAGAAGGATTTTGAATTAT
	t1s30g	TTTGACGAGCACGTATATTCTGAAATGGATTATTTTTAATAAAAGT
	t1s4i	TAGCGTCATTTGTCTCTGAATTTACCGACTACCTTT
	t1s6i	TTTCATAATTTCCCCTTATTAGCGTTTTTCTTACCT
	t1s8i	TATGGTTTATTTGTCACAATCAATAGATATTAAACT
	t2s11g	TAGAAAAGCCCCAAAAATTGAGTCTGGAGCAAACATTATCACCATT
	t2s13g	TACAGTCAATTAGAGAATCGATGAACGTTACCCCGGTTGATAATCT
	t2s15f	TATAGTAGTTTATGCAATGCCTGAGTATTGGCCGGAGT
	t2s17f	TAACCAGACTTGTTTAGCTATATTTTCTTTTCTACTAT
	t2s1g	TGATAAGTGCCGTCGAGTTCTGAAACATGAAAGTATTTACAGGAGT
	t2s21g	TCCTGATTGCTTTGAATTTTGCGTAGATTTTCAGGTTCATCAATAT
	t2s23g	TTGGCAATTTTTTTAACGTCAGATGAATTAACAATAACGGATTCGT
	t2s25f	TAAGGAATTTTACAAAGAAACCACCAGTTTCAGATGAT
	t2s27f	TGGACATTCTTACCTCAAATATCAAACTTACAGTTGAT
	t2s3g	TTTTGATGATTTTAAGAGGCTGAGACTTTTGCTCAGTACCAGGCGT
	t2s5f	TCCGGAACCTTCAGAATGGAAAGCGCATTACATGGCTT
	t2s7f	TAAAGACAATTCATTTTCGGTCATAGCTTCAAAATCAT
	t3s10g	TGTCAGAGGGTAATTGATTTGGCAACATATAAAAGTTCGATTGAGT
	t3s14e	TCAATATGATTCCCTCATATATTTTAATTAGCATTAAT
	t3s16e	TCATCCAATTTAAATGGTCAATAACCTTTCGGAAGCAT
	t3s18g	TAACTCCAATTGATTGCATCAAAAAGATTTAATGCAGATACATAAT
	t3s20g	TCGCCAAAAGGAATTACTTAGTCAGAAGCAAAGCGTTCAGGTCAGT
	t3s24e	TTAATCCTGTTATTATCATTTTGCGGATTGAGGAAGGT
	t3s26e	TTTATCTAATTAGCATCACCTTGCTGATTTGGCCAACT
	t3s28g	TAGAGATAGTTTTTGACGCTCAATCGTTTACGTGCTTTCCTCGTTT
	t3s30g	TAGAATCAGAGCGGGAGTTATGGAAATACCTACATTTAACCCTTCT
	t3s4e	TTGTACTGGTTAAATCCTCATTAAAGCTTAGAGCCACT
	t3s6e	TCACCGGAATTAGCGCGTTTTCATCGGTTAAGGGCGAT
	t3s8g	TCATTCAACTTAAACGCAAAGACACCATTGAACACCCTGAACAAAT
	t4s11g	TGCAAATATTTAAATTGTTAGATCTACAAAGGCTATTCTGATAAAT
	t4s13g	TCGTTCTAGTTTCAGGTCATTGCCTGATTCAGGAAGATTGTATAAT
	t4s15f	TCAGGCAAGTTATAAAAATTTTTAGAATTTATTCAACT
	t4s17f	TGATTAGAGTTATTAGATACATTTCGCTTAAATCATAT
	t4s1g	TTAGCCCGGAATAGGTGTTAATGCCCCCTGCCTATTTGGTCAGTGT
	t4s21g	TGCGCAGAGGCGAATTATTATTATTTGCACGTAAATTTTCTGAATT
	t4s23g	TGATTATACTTACAGAAATAAAGAAATTTACCAAGTTACAAAATCT
	t4s25f	TTAGGAGCATTTAAAAGTTTGAGTAACTTATTGTTTGT
	t4s27f	TTGACCTGATTCAAATGAAAAATCTAATTAATATCTTT
	t4s3g	TTTTAACGGTTTTCGGAACCTATTATTTTAGGGTTGATATAAGTAT
	t4s5f	TCTCAGAGCTTATATTCACAAACAAATTTTAATAAGTT
	t4s7f	TGGAGGGAATTTTTAGCGTCAGACTGTTTCCGCCTCCT
	t5s10g	TGATAACCCACAAGAATTTGTTAGCAAACGTAGAATTAATTATTCT
	t5s14e	TTTAATGCCTTTTATTTCAACGCAAGGTTGCAAAGAAT
	t5s16e	TTTAGCAAATTTAGATTTAGTTTGACCTTAGTACCTTT
	t5s18g	TTAATTGCTTTTTACCCTGACTATTATTTGAGGCATAGTAAGAGCT
	t5s20g	TAACACTATCATAACCCTTATCAAAAATCAGGTCTTTCCTTTTGAT
	t5s24e	TAATGGAAGTTCGAACGTTATTAATTTTTCTAACAACT
	t5s26e	TTAATAGATTTCGCTGAGAGCCAGCAGTTAAGCGTAAT
	t5s28g	TGAATACGTTTAACAGGAAAAACGCTCTTCTAAACAGGAGGCCGAT
	t5s30g	TTTAAAGGGATTTTAGATTTACCGCCAGCCATTGCTTGGCACAGAT
	t5s4e	TCCTTGAGTTTCAGACGATTGGCCTTGTTCGCCACCCT
	t5s6e	TTCAGAACCTTCAGAATCAAGTTTGCCTTGGTAAATAT
	t5s8g	TTTGACGGATTAATACATACATAAAGGTTGCGCTAATATCAGAGAT
	t6s15g	TATAAAGCCTTTTTGCGGGAGAAGCCTTTGGAGAGGGTAGT
	t6s17f	TTAAGAGGTTTCAATTCTGCGAACGAGTTATTAAGCAT
	t6s25g	TTCAATAGATTTATTAAATCCTTTGCCTTGGTTAGAACCTT
	t6s27f	TCAATATTTTTGCCTGCAACAGTGCCATTTAGAGCCGT
	t6s5g	TCAGAGCCATTGGAGGTTGAGGCAGGTTTAACAGTGCCCGT
	t6s7f	TATTAAAGGTTCCGTAATCAGTAGCGATTGCCACCCTT
	t7s10g	TATAAGAGCAAGAAACATTTGGCATGATTAAGACTTTCCGACTTGT
	t7s14e	TATGACCCTGTAATACTTTTCAGAGCAT
	t7s16e	TTAAAGCTATTTATAACAGTTGATTCCTTCATTTTTGT
	t7s18g	TCGGATGGCTTACGAGAATGACCATAATTTCGTTTACCAGACGACT
	t7s20g	TGATAAAAACCAAAATATTTTAAACAGTTCAGAAATTTTAGAGCTT
	t7s24e	TACAATTCGACAACTCGTTTAATACATT
	t7s26e	TTTGAGGATTTGGTCAGTATTAACACCTTTTGAATGGT
	t7s28g	TCTATTAGTTTATATCCAGAACAATATTTCAGGAACGGTACGCCAT
	t7s30g	TGAATCCTGAGAAGTGTTTATCGGCCTTGCTGGTATTCTTTAATGT
	t7s4e	TGCCGCCAGCATTGACATTCCACCCTCT
	t7s6e	TAGAGCCGCTTACCATCGATAGCAGCATTTGAATTATT
	t7s8g	TCACCGTCATTCCTTATTACGCAGTATTTTGAGTTAAGCCCAATAT
	t8s17g	TTAATTGCTTTTGGAAGTTTCATTCCATTAATCGGTTGTAT
